# Supplementary material
Source: PubMed Central journal article supplement (PMC5726886)
Supplement: NIHMS921510-supplement-Supplement1.pdf [file NIHMS921510-supplement-Supplement1.pdf]

## Supplementary Appendix

This appendix has been provided by the authors to give readers additional information about their work.

Supplement to: Landry CH, Allan KS, Connelly KA, Cunningham K, Morrison LJ, Dorian P. Sudden cardiac arrest during participation in competitive sports. *N Engl J Med* 2017;377:1943-53. DOI: 10.1056/NEJMoa1615710

## **Supplementary Appendix: Sudden cardiac arrest during competitive sport**

Cameron H. Landry, MD, MSc<sup>1</sup>

Katherine S. Allan, PhD<sup>2</sup>

Kim A. Connelly, MBBS, PhD<sup>3,4</sup>

Kris Cunningham, MD, PhD<sup>5</sup>

Laurie J. Morrison, MD, MSc<sup>6,7</sup>

Paul Dorian, MD, MSc<sup>1,3,8</sup>, on behalf of the Rescu Epistry Investigators

### **Author's Affiliations:**

<sup>1</sup> Faculty of Medicine, University of Toronto, Toronto, Ontario, Canada.

<sup>2</sup> School of Nursing, McMaster University, Hamilton, Canada.

<sup>3</sup> Division of Cardiology, St. Michael's Hospital, Toronto, Canada.

<sup>4</sup> Keenan Research Centre for Biomedical Research, Li Ka Shing Knowledge Institute, St. Michael's Hospital, Toronto, Canada.

<sup>5</sup> Department of Laboratory Medicine and Pathobiology, University of Toronto and Ontario Forensic Pathology Service, Toronto, Canada

<sup>6</sup> Institute of Health Policy, Management and Evaluation, Faculty of Medicine, University of Toronto, Toronto, Canada.

<sup>7</sup> Rescu, Li Ka Shing Knowledge Institute, St. Michael's Hospital, Division of Emergency Medicine, Department of Medicine, University of Toronto, Toronto, Canada.

<sup>8</sup> Department of Medicine, University of Toronto, Toronto, Ontario, Canada.

### **\*Corresponding Author:**

Paul Dorian, MD  
Division of Cardiology, University of Toronto  
St. Michael's Hospital  
30 Bond St. Toronto ON M5B 1W8  
Email: dorianp@smh.ca

### **Rescu Epistry Investigators:**

Barto Nascimiento, Damon Scales, Dennis Ko, Jamie Hutchison, Katie Dainty, Laurie Morrison, Paul Dorian, Richard Swartz, Richard Verbeek, Sandro Rizoli, Sheldon Cheskes, Steven Brooks, Steve Lin and Tim Chan.

**Table of Contents**

|      |                                                            |             |
|------|------------------------------------------------------------|-------------|
| i)   | Methods: Cardiac Etiology Descriptions                     | Pages 3-4   |
| ii)  | Figure S1: Map of RescuNet Ontario, Canada                 | Page 5      |
| iii) | Table S1: Details of SCA in Non-Competitive Athletes       | Pages 6-10  |
| iv)  | Table S2: Arrest by Sport-type in Non-Competitive Athletes | Pages 11-12 |
| v)   | References                                                 | Pages 13-14 |

## **Methods: Cardiac Etiology Descriptions**

### **1. Ischemic/Coronary Artery Disease:**

1) Moderate to severe atherosclerotic disease in  $\geq 1$  major coronary artery (stenosis  $\geq 70\%$ ); 2) thrombosis or plaque hemorrhage in one or more major coronary arteries; or 3) acute or healed/chronic myocardial infarction.<sup>1,2</sup>

### **2. Structural Heart Disease was one of:**

- a. **Hypertrophic Cardiomyopathy (HCM):** Widespread myocyte fibre disarray, left ventricular hypertrophy (LVH) (ventricular wall thickness  $\geq 15$  mm), and marked cardiomyocyte hypertrophy are required for the diagnosis. Most hearts also exhibit cardiomegaly (heart weight  $\geq 500$ g) and fibrous tissue deposition.<sup>1,3</sup>
- b. **Non-Specific Cardiomyopathy:** Heart weight increased over value predicted for normal body weight, LVH or both right and left ventricular wall hypertrophy, dilation of both atria and ventricles<sup>4</sup>.
- c. **Arrhythmogenic Right Ventricular Cardiomyopathy (ARVC):** Right ventricular thinning or aneurysms, fatty replacement, fibrosis and microscopically fat and fibrosis of the wall of the right and/or left ventricle.<sup>1,3</sup>
- d. **Myocarditis:** Multiple foci of interstitial inflammatory infiltrate with/without myocyte necrosis in the myocardium.<sup>2</sup>
- e. **Dilated cardiomyopathy:** Cardiomegaly with dilated ventricles and in the absence of hypertension, valve disease, or significant coronary artery disease.<sup>3,5,6</sup>
- f. **Valvular Heart Disease:** Evidence of valvular disease on autopsy (e.g. stenosis, thickening, fibrosis, etc.) and in the absence of CAD and any other cardiac findings and considered causative for the SD event.

- g. **Williams Syndrome:** Evidence of systemic arterial stenosis, usually supraaortic stenosis or coronary artery stenosis<sup>7</sup>.
- 3. Primary Arrhythmia Syndrome:**
- Referring to survivors – no specific arrhythmia disorder determined; no anatomical or toxicological cause of arrest established following review of medical history or with investigations, including ECG, echocardiogram, stress testing, angiography or MRI (in select cases). These cases are also referred to as idiopathic ventricular fibrillation (VF)<sup>8</sup>.
- Referring to non-survivors – the etiology was presumed to be due to a *primary arrhythmia* when there was no anatomical or toxicological cause of death established after autopsy with circumstances or medical history supporting an arrhythmic event<sup>9</sup>.
- These cases have also been referred to as sudden unexplained death syndrome (SUDS) or sudden arrhythmic death syndrome (SADS)<sup>10</sup>.
4. **Congenital Cardiac Diseases:** Including anomalous coronary arteries, atrial-septal defects, ventricular-septal defects, repaired congenital disease (e.g. Tetralogy of Fallot), etc., considered causative if autopsy reveals no other cause of death.
5. **Cardiac Disease Unspecified:** lacking sufficient information (e.g. no autopsy or survivor with limited clinical information regarding diagnosis) to arrive at a cardiac sub-type etiology (e.g. ARVC) or that had 2 or more competing cardiac etiologies

**Supplementary Figures S1:**

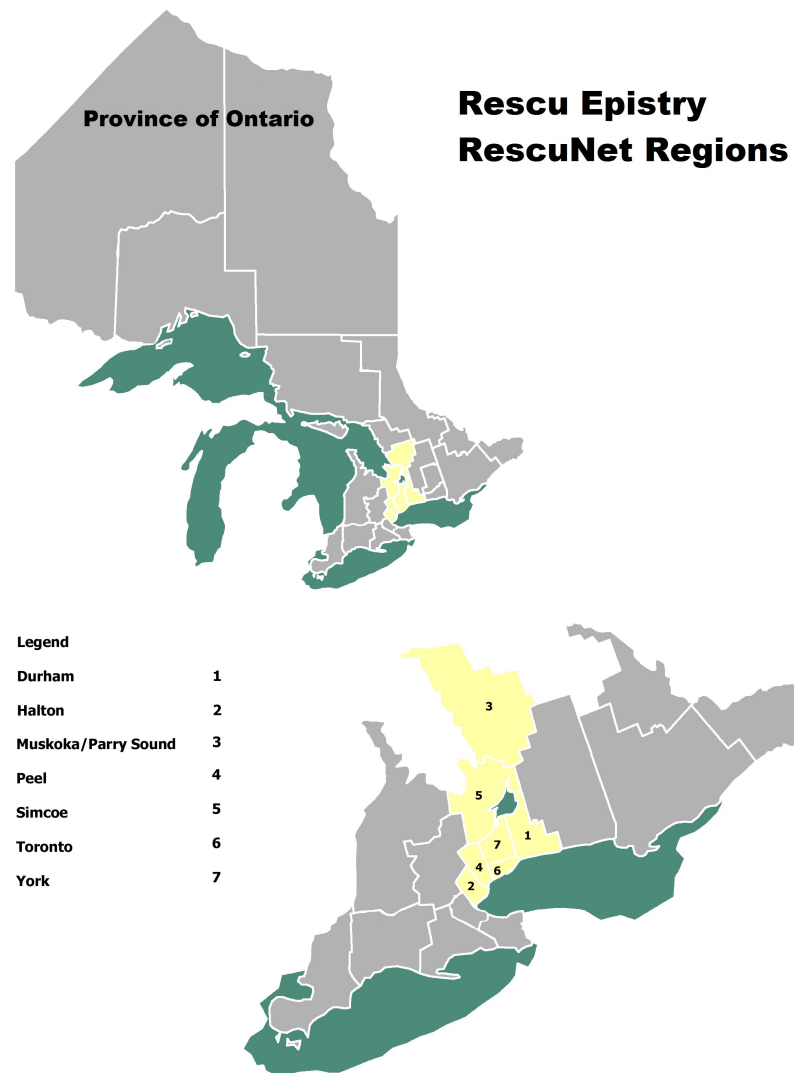

**Figure S1: Map of Rescu Epistry Network (RescuNet), Ontario, Canada.** The RescuNet region includes the regions of Toronto, Durham, Halton, York, Peel, Simcoe and Muskoka, each of which has a single EMS agency. Area in yellow is the geographic area covered by these agencies. Area in green represents the Great Lakes.

**Supplementary Tables:****Table S1. Details of Sudden Cardiac Arrests (SCAs) in Non-Competitive Athletes**

| Patient # | Sex | Age | Bystander Witnessed | Bystander CPR | EMS Response Time (min) | Initial Rhythm | Number of Shocks | Outcome  | Survived | Autopsy | Molecular Autopsy | Etiology                    | Basis of Diagnosis | Follow up                                         |
|-----------|-----|-----|---------------------|---------------|-------------------------|----------------|------------------|----------|----------|---------|-------------------|-----------------------------|--------------------|---------------------------------------------------|
| 1         | M   | 14  | Y                   | N             | Not documented          | VF/VT          | 2                | Admitted | Y        | N/A     | /                 | Unknown†                    | No Diagnosis       | Unknown                                           |
| 2         | F   | 27  | Y                   | N             | Not documented          | VF/VT          | 1                | Admitted | Y        | N/A     | /                 | Unknown†                    | No Diagnosis       | Unknown                                           |
| 3         | M   | 44  | Y                   | Y             | 2                       | VF/VT          | 0                | Admitted | Y        | N/A     | /                 | Ischemic                    | Angiogram          | CABG                                              |
| 4         | M   | 21  | N                   | N             | 2                       | VF/VT          | 2                | Admitted | Y        | N/A     | /                 | HCM <sup>y</sup>            | ECHO               | ICD implanted                                     |
| 5         | M   | 44  | Y                   | Y             | Not documented          | VF/VT          | 4                | Admitted | Y        | N/A     | /                 | Ischemic                    | Angiogram          | Unknown                                           |
| 6         | M   | 44  | Y                   | Y             | 4                       | VF/VT          | 1                | Admitted | Y        | N/A     | /                 | Ischemic                    | Angiogram          | History of CABG prior to arrest; ICD implanted    |
| 7         | M   | 15  | Y                   | Y             | 2.2                     | VF/VT          | 1                | Admitted | Y        | N/A     | /                 | Primary Arrhythmic          | No Diagnosis       | Normal ECG, ECHO, Stress Test; MRI non-diagnostic |
| 8         | F   | 31  | Y                   | N             | 5                       | PEA            | 0                | Admitted | Y        | N/A     | /                 | Non-specific Cardiomyopathy | ECHO               | Unknown                                           |
| 9         | M   | 16  | Y                   | Y             | 5.5                     | VF/VT          | 1                | Admitted | Y        | N/A     | /                 | Unknown†                    | No Diagnosis       | Unknown                                           |
| 10        | M   | 36  | N                   | Y             | 5.2                     | VF/VT          | 3                | Admitted | Y        | N/A     | /                 | Dilated Cardiomyopathy      | ECHO               | Angiogram showed normal coronaries; ICD implanted |
| 11        | F   | 19  | Y                   | Y             | 4.8                     | VF/VT          | 4                | Admitted | Y        | N/A     | /                 | Unknown†                    | No Diagnosis       | Unknown                                           |

|    |   |    |   |   |                |               |   |          |   |     |   |                      |              |                                                                            |
|----|---|----|---|---|----------------|---------------|---|----------|---|-----|---|----------------------|--------------|----------------------------------------------------------------------------|
| 12 | M | 38 | Y | Y | 6.5            | VF/VT         | 6 | Admitted | Y | N/A | / | Ischemic             | Angiogram    | Unknown                                                                    |
| 13 | M | 25 | Y | Y | 2.9            | VF/VT         | 2 | Admitted | Y | N/A | / | Primary Arrhythmic   | No Diagnosis | Angiogram and EP studies normal                                            |
| 14 | M | 34 | N | N | Not documented | VF/VT         | 4 | Admitted | Y | N/A | / | Ischemic             | Angiogram    | Unknown                                                                    |
| 15 | M | 42 | N | N | 12             | VF/VT         | 1 | Admitted | Y | N/A | / | Ischemic             | Angiogram    | Unknown                                                                    |
| 16 | M | 41 | Y | Y | Not documented | VF/VT         | 0 | Admitted | Y | N/A | / | Ischemic             | Angiogram    | Unknown                                                                    |
| 17 | M | 13 | Y | Y | 5.8            | PEA           | 0 | Admitted | Y | N/A | / | HCM <sup>y</sup>     | ECHO         | ICD previously placed for VF/VT                                            |
| 18 | M | 44 | Y | Y | 4.9            | VF/VT         | 0 | Admitted | Y | N/A | / | Ischemic             | Angiogram    | Unknown                                                                    |
| 19 | M | 41 | N | N | 6.9            | VF/VT         | 2 | Admitted | Y | N/A | / | Ischemic             | Angiogram    | Unknown                                                                    |
| 20 | M | 39 | Y | Y | 4.5            | VF/VT         | 0 | Admitted | Y | N/A | / | Ischemic             | Angiogram    | PCI and stents placed                                                      |
| 21 | M | 20 | Y | Y | 7.2            | VF/VT         | 3 | Admitted | Y | N/A | / | Anomalous Coronaries | Angiogram    | Unknown                                                                    |
| 22 | M | 14 | N | Y | 7              | VF/VT         | 0 | Admitted | Y | N/A | / | Primary Arrhythmic   | No Diagnosis | ECG, ECHO and Stress test non-diagnostic; EP studies normal; ICD implanted |
| 23 | M | 15 | Y | Y | 5              | Not shockable | 3 | Admitted | Y | N/A | / | Tetralogy of Fallot  | History      | History of ToF repair; ICD implanted                                       |
| 24 | M | 33 | Y | Y | 3              | VF/VT         | 5 | Admitted | Y | N/A | / | Primary Arrhythmic   | No Diagnosis | Normal ECG, ECHO, and angiogram                                            |



|    |   |    |                |                |                |               |   |            |   |     |   |                                   |                |                                         |
|----|---|----|----------------|----------------|----------------|---------------|---|------------|---|-----|---|-----------------------------------|----------------|-----------------------------------------|
| 25 | M | 21 | Y              | Y              | 11.5           | VF/VT         | 5 | Admitted   | Y | N/A | / | Primary Arrhythmic                | No Diagnosis   | Normal ECG, ECHO and MRI; ICD implanted |
| 26 | M | 41 | N              | N              | 4.9            | VF/VT         | 1 | Admitted   | Y | N/A | / | Ischemic                          | Angiogram      | Unknown                                 |
| 27 | M | 39 | Y              | Y              | Not documented | VF/VT         | 3 | Died in ED | N | Y   | / | ARVC <sup>sp</sup>                | Autopsy        | N/A                                     |
| 28 | M | 41 | Y              | N              | Not documented | VF/VT         | 7 | Died in ED | N | Y   | / | Ischemic                          | Autopsy        | N/A                                     |
| 29 | F | 32 | N              | N              | Not documented | Asystole      | 0 | Died in ED | N | Y   | / | Valvular Cardiomyopathy           | Autopsy        | N/A                                     |
| 30 | M | 14 | Y              | Y              | Not documented | VF/VT         | 2 | Admitted   | N | Y   | / | Anomalous Coronaries              | Autopsy        | N/A                                     |
| 31 | M | 44 | Y              | Y              | Not documented | Asystole      | 0 | Died in ED | N | Y   | / | Ischemic                          | Autopsy        | N/A                                     |
| 32 | M | 42 | Y              | Y              | Not documented | VF/VT         | 5 | Admitted   | N | Y   | / | Ischemic                          | Autopsy        | N/A                                     |
| 33 | M | 34 | Y              | Y              | 5.9            | VF/VT         | 0 | Died in ED | N | Y   | / | ARVC <sup>sp</sup>                | Autopsy        | N/A                                     |
| 34 | M | 37 | Y              | Y              | 6.8            | VF/VT         | 2 | Died in ED | N | Y   | / | Ischemic                          | Autopsy        | N/A                                     |
| 35 | M | 26 | Y              | Not Documented | 5              | VF/VT         | 3 | Admitted   | N | Y   | / | William's Syndrome Cardiomyopathy | Autopsy        | N/A                                     |
| 36 | M | 30 | Not Documented | N              | 13             | VF/VT         | 2 | Died in ED | N | Y   | / | Ischemic                          | Autopsy        | N/A                                     |
| 37 | M | 12 | N              | Y              | 8              | PEA           | 1 | Admitted   | N | Y   | / | Primary Arrhythmic                | Normal Autopsy | N/A                                     |
| 38 | M | 31 | Y              | N              | 7              | Not shockable | 0 | Died in ED | N | Y   | / | Ischemic                          | Autopsy        | N/A                                     |

|    |   |    |   |   |                |                |    |               |   |                |                                     |                             |                |     |
|----|---|----|---|---|----------------|----------------|----|---------------|---|----------------|-------------------------------------|-----------------------------|----------------|-----|
| 39 | M | 13 | Y | Y | Not documented | VF/VT          | 3  | Died in ED    | N | Y              | /                                   | Primary Arrhythmic          | Normal Autopsy | N/A |
| 40 | F | 21 | Y | N | 4.2            | VF/VT          | 10 | Admitted      | N | Y              | /                                   | Long QT Syndrome            | ECG            | N/A |
| 41 | M | 42 | Y | Y | 6.7            | VF/VT          | 5  | Died in ED    | N | Y              | /                                   | ARVC <sup>y</sup>           | Autopsy        | N/A |
| 42 | M | 44 | Y | Y | 3.8            | VF/VT          | 2  | Died in ED    | N | Y              | /                                   | Ischemic                    | Autopsy        | N/A |
| 43 | M | 43 | N | Y | 2.7            | VF/VT          | 3  | Died in ED    | N | Y              | /                                   | Ischemic                    | Autopsy        | N/A |
| 44 | M | 42 | N | N | 5.9            | VF/VT          | 2  | Died in ED    | N | Y              | /                                   | Ischemic                    | Autopsy        | N/A |
| 45 | M | 36 | Y | Y | 8              | Not shockable  | 0  | Died in ED    | N | Y              | Mutation of unknown significance ** | ARVC <sup>y</sup>           | Autopsy        | N/A |
| 46 | M | 22 | N | N | 4.5            | Asystole       | 0  | Died in ED    | N | Y              | /                                   | Primary Arrhythmic          | Normal Autopsy | N/A |
| 47 | M | 30 | Y | Y | 8.7            | VF/VT          | 1  | Died in ED    | N | Y              | /                                   | Ischemic                    | Autopsy        | N/A |
| 48 | M | 40 | Y | Y | Not documented | VF/VT          | 2  | Died in ED    | N | Y              | /                                   | Ischemic                    | Autopsy        | N/A |
| 49 | M | 32 | N | N | 8.5            | Not documented | 0  | Died at scene | N | Y              | /                                   | Ischemic                    | Autopsy        | N/A |
| 50 | M | 44 | Y | N | 6.9            | VF/VT          | 4  | Died in ED    | N | Y              | /                                   | Ischemic                    | Autopsy        | N/A |
| 51 | M | 39 | N | N | 8.3            | VF/VT          | 6  | Died in ED    | N | Y              | /                                   | Ischemic                    | Autopsy        | N/A |
| 52 | M | 44 | Y | Y | 4.8            | VF/VT          | 5  | Died in ED    | N | N <sup>φ</sup> | /                                   | Cardiac Disease Unspecified | Coroner Record | N/A |
| 53 | M | 43 | N | Y | 14.4           | Asystole       | 0  | Died at scene | N | Y              | /                                   | HCM <sup>y</sup>            | Autopsy        | N/A |

|    |   |    |   |   |                |       |   |            |   |    |                                              |                             |                |     |
|----|---|----|---|---|----------------|-------|---|------------|---|----|----------------------------------------------|-----------------------------|----------------|-----|
| 54 | M | 40 | Y | N | 3              | VF/VT | 3 | Died in ED | N | Y  | Pathogenic mutation <sup>Δ</sup>             | HCM <sup>Ψ</sup>            | Autopsy        | N/A |
| 55 | M | 41 | Y | Y | 4.8            | VF/VT | 3 | Died in ED | N | Y  | No mutations detected                        | Dilated Cardiomyopathy      | Autopsy        | N/A |
| 56 | F | 42 | Y | Y | 2.5            | VF/VT | 8 | Admitted   | N | Y  | Variant of unknown significance <sup>Ω</sup> | Non-specific Cardiomyopathy | Autopsy        | N/A |
| 57 | M | 40 | Y | Y | 7.5            | VF/VT | 1 | Died in ED | N | Y  | Variant of unknown significance <sup>Π</sup> | Aortic Dissection           | Autopsy        | N/A |
| 58 | M | 44 | N | N | Not documented | VF/VT | 1 | Died in ED | N | N* | /                                            | Ischemic                    | Coroner Record | N/A |

† The designation “unknown” was used as no clinical testing information were available for these patients

Ψ Arrhythmogenic Right Ventricular Cardiomyopathy (ARVC)

Y Hypertrophic Cardiomyopathy (HCM)

\* In-hospital investigations and clinical data determined ischemia; autopsy not indicated

Φ In-hospital investigations and clinical data determined likely ischemia; autopsy not indicated

\*\* Negative for ARVC mutations; missense variant c.1826C>G (p.A609G) in TRPM4 gene

Δ MT-ND5 Val147Met

Ω DSP Ser2843Arg2846del

Π MYH11 Exon 28 Lys 256 del

**Table S2. Total Number of Arrests by Sport Type in Non-Competitive Athletes**

| <b>Sport</b>       | <b>Total Arrests 2009-2014</b> |
|--------------------|--------------------------------|
| Running            | 9                              |
| Baseball           | 0                              |
| Basketball         | 7                              |
| Cricket            | 3                              |
| Cycling            | 3                              |
| Golf               | 1                              |
| Gymnastics         | 0                              |
| Hockey (ice)       | 5                              |
| Hockey (ball)      | 4                              |
| Jiu Jitsu          | 0                              |
| Lacrosse           | 0                              |
| University/College | 0                              |
| Rugby              | 0                              |
| Soccer             | 3                              |
| Softball           | 0                              |
| Squash             | 2                              |
| Swimming           | 7                              |
| Tennis             | 0                              |

|              |    |
|--------------|----|
| Volleyball   | 0  |
| Gym          | 12 |
| Other $\Phi$ | 2  |
| Total        | 58 |

$\Phi$  Includes alpine, badminton, boxing, cross country, curling, disc sports, dive, equestrian, fencing, field hockey, football, rowing, sailing, scooter, Special Olympics, table tennis, handball, water polo, weight lifting, wheelchair spots, wrestling, etc

**Supplementary Reference List**

1. Papadakis M, Raju H, Behr ER et al. Sudden cardiac death with autopsy findings of uncertain significance: potential for erroneous interpretation. *Circulation: Arrhythmia and Electrophysiology* 2013;6(3):588-596.
2. Risgaard B, Winkel BG, Jabbari R et al. Burden of sudden cardiac death in persons aged 1 to 49 years: nationwide study in Denmark. *Circulation: Arrhythmia and Electrophysiology* 2014;7(2):205-211.
3. Burke A, Tavora F. *Practical Cardiovascular Pathology: An Atlas*. Philadelphia: Wolters Kluwer Health/Lippincott Williams & Wilkins; 2011.
4. Hookana E, Junttila MJ, Puurunen VP et al. Causes of nonischemic sudden cardiac death in the current era. *Heart Rhythm* 2011;8(10):1570-1575.
5. Elliott P, Andersson B, Arbustini E et al. Classification of the cardiomyopathies: a position statement from the European Society Of Cardiology Working Group on Myocardial and Pericardial Diseases. *Eur Heart J* 2008;29(2):270-276.
6. Maron BJ, Towbin JA, Thiene G et al. Contemporary definitions and classification of the cardiomyopathies: an American Heart Association Scientific Statement from the Council on Clinical Cardiology, Heart Failure and Transplantation Committee; Quality of Care and Outcomes Research and Functional Genomics and Translational Biology Interdisciplinary Working Groups; and Council on Epidemiology and Prevention. *Circulation* 2006;113(14):1807-1816.

7. Bird LM, Billman GF, Lacro RV, et al. Sudden death in Williams Syndrome: report of ten cases. *J Pediatr* 1998; 129:926
8. Herman ARM, Cheung C, Gerull B, et al. Outcome of apparently unexplained cardiac arrest: Results from investigation and follow-up of the prospective cardiac arrest survivors with preserved ejection fraction registry. *Circ Arrhythmia Electrophysiol* 2016;9(1).
9. Pilmer CM, Porter B, Kirsh JA et al. Scope and nature of sudden cardiac death before age 40 in Ontario: a report from the cardiac death advisory committee of the office of the chief coroner. *Heart Rhythm* 2013;10(4):517-523.
10. Semsarian C, Ingles J, Wilde AAM. Sudden cardiac death in the young: The molecular autopsy and a practical approach to surviving relatives. *Eur Heart J* 2015;36(21):1290–6.
